# Supplementary material for: Identifying Genetic Variants and Metabolites Associated with Rapid Estimated Glomerular Filtration Rate Decline in Korea Based on Genome–Metabolomic Integrative Analysis
Source: MDPI journal article supplement (doi:10.3390/metabo12111139), 2022-11-19
Supplement: s1 [file s1]

## Supplementary Material Table of Contents

- 1) Figure S1. Study population and workflow for the genome-metabolomics integrative analysis (GMIA).
- 2) Figure S2. Manhattan and quantile-quantile plots of GWAS for the rapid decline in the estimated glomerular filtration rate. (A) K-CHIP consortium: discovery dataset. (B) KNOW-CKD cohort: validation dataset. GWAS, genome-wide association study; K-CHIP, Korean Chip; KNOW-CKD, The KoreaN Cohort Study for Outcomes in Patients With Chronic Kidney Disease.
- 3) Figure S3. Associations between SNPs and the serum creatine concentration using a linear regression model from GMIA. (A) G: reference allele; C: effect allele of rs183537972 (HYAL6P). (B) C: reference allele; T: effect allele of rs145083655 (HYAL4). (C) G: reference allele; A: effect allele of rs116869578 (LMOD2). (D) G: reference allele; A: effect allele of rs148528467 (WASL). GMIA, genome-metabolomics integrative analysis; SNP, single nucleotide polymorphism.
- 4) Table S1. List of 135 serum metabolites in the KARE cohort
- 5) Table S2. Genome-wide association study-derived genetic variants in the K-CHIP consortium
- 6) Table S3. Fine-mapping of the lead SNPs from the GWAS results

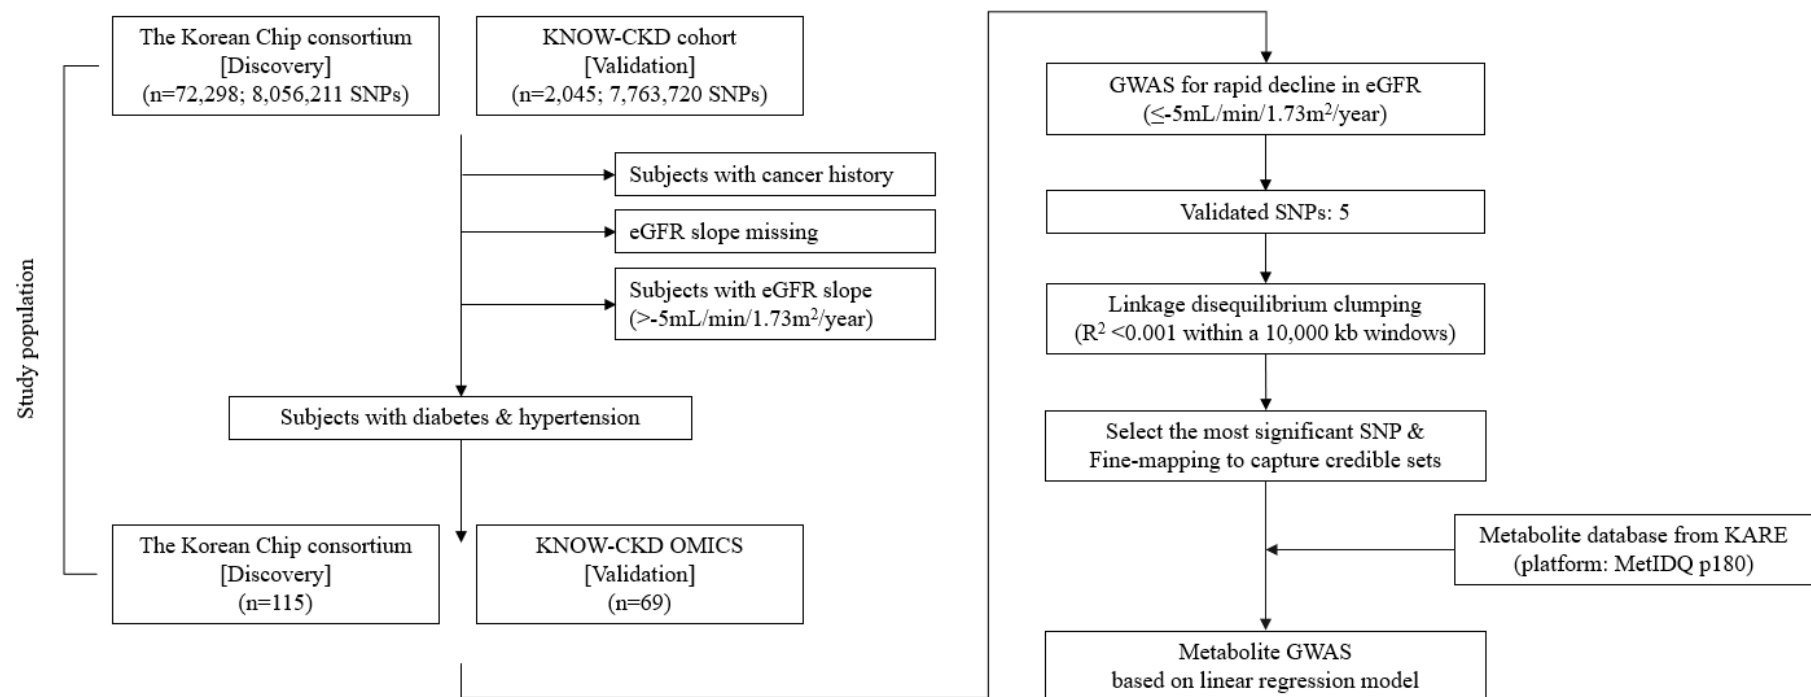

Figure S1. Study population and workflow for the genome-metabolomics integrative analysis (GMIA).

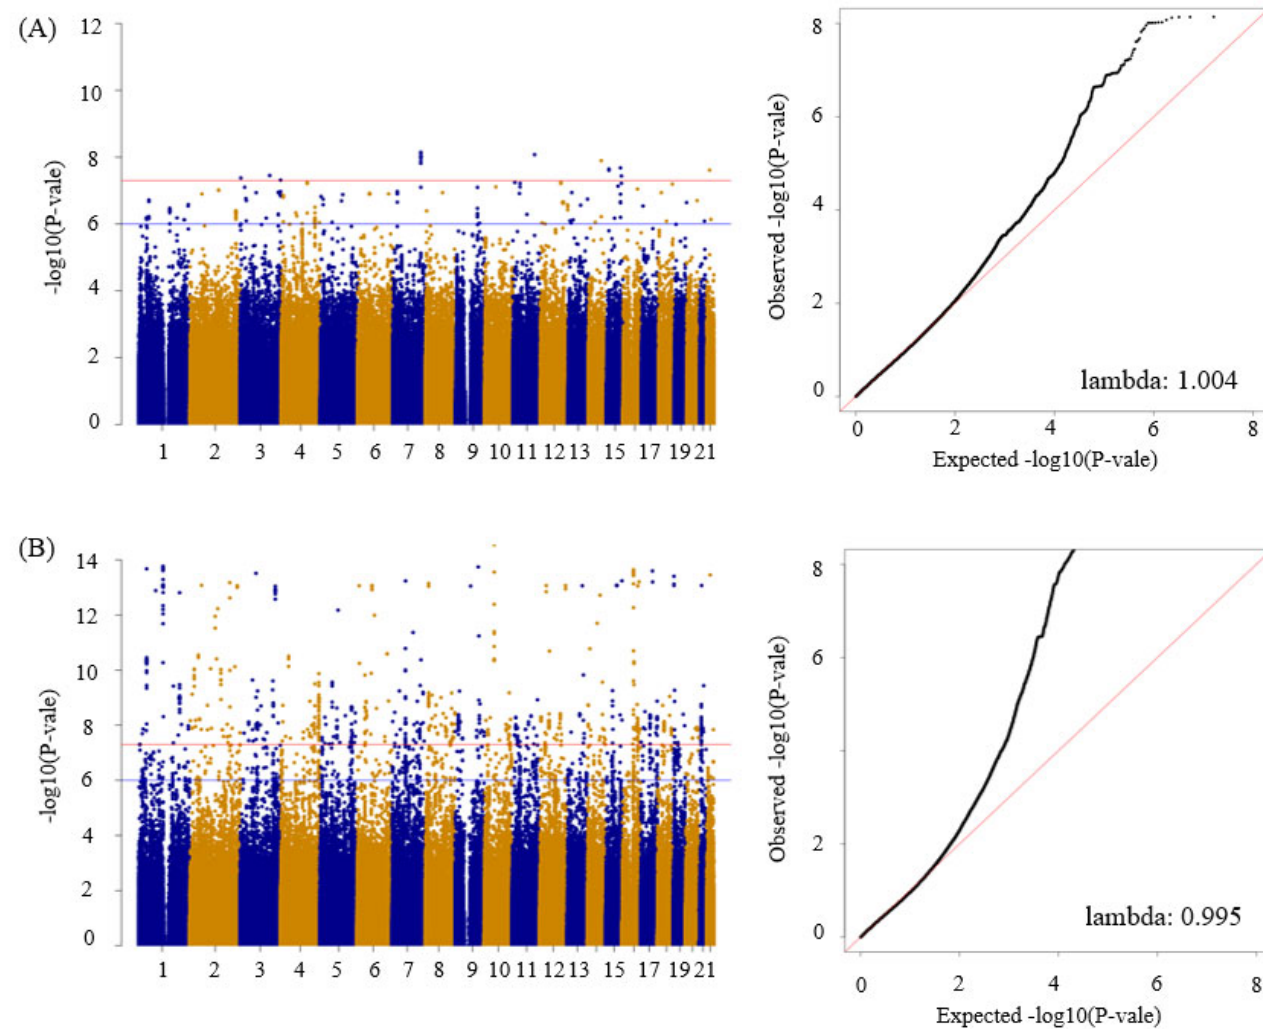

Figure S2. Manhattan and quantile-quantile plots of GWAS for the rapid decline in the estimated glomerular filtration rate. (A) K-CHIP consortium: discovery dataset. (B) KNOW-CKD cohort: validation dataset. GWAS, genome-wide association study; K-CHIP, Korean Chip; KNOW-CKD, The KoreaN Cohort Study for Outcomes in Patients With Chronic Kidney Disease.

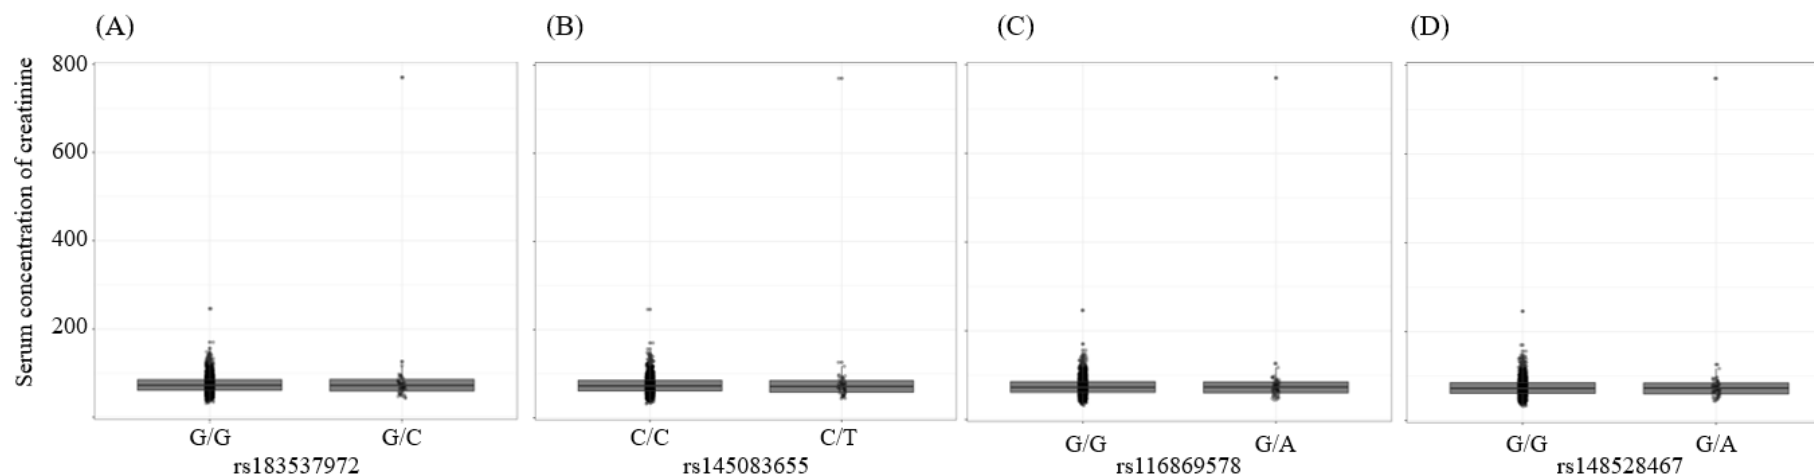

Figure S3. Associations between SNPs and the serum creatine concentration using a linear regression model from GMIA. (A) G: reference allele; C: effect allele of rs183537972 (HYAL6P). (B) C: reference allele; T: effect allele of rs145083655 (HYAL4). (C) G: reference allele; A: effect allele of rs116869578 (LMOD2). (D) G: reference allele; A: effect allele of rs148528467 (WASL). GMIA, genome-metabolomics integrative analysis; SNP, single nucleotide polymorphism.

Table S1. List of 135 serum metabolites in the KARE cohort

| <b>Acylcarnitine</b>     | <b>Amino acids</b> | <b>Biogenic amines</b>      | <b>Sugar</b> | <b>Lyso Phosphatidylcholine</b>     | <b>Phosphatidylcholine diacyl</b> |
|--------------------------|--------------------|-----------------------------|--------------|-------------------------------------|-----------------------------------|
| Carnitine                | Alanine            | Acetylornithine             | Hexose       | Lyso Phosphatidylcholine acyl C16:0 | Phosphatidylcholine diacyl C28:1  |
| Acetylcarnitine          | Arginine           | Asymmetric dimethylarginine |              | Lyso Phosphatidylcholine acyl C16:1 | Phosphatidylcholine diacyl C30:0  |
| Propionylcarnitine       | Asparagine         | Creatinine                  |              | Lyso Phosphatidylcholine acyl C17:0 | Phosphatidylcholine diacyl C32:0  |
| Butyrylcarnitine         | Aspartate          | Kynurenine                  |              | Lyso Phosphatidylcholine acyl C18:0 | Phosphatidylcholine diacyl C32:1  |
| Valerylcarnitine         | Citrulline         | Putrescine                  |              | Lyso Phosphatidylcholine acyl C18:1 | Phosphatidylcholine diacyl C32:3  |
| Pimelylcarnitine         | Glutamine          | Sarcosine                   |              | Lyso Phosphatidylcholine acyl C18:2 | Phosphatidylcholine diacyl C34:1  |
| Octanoylcarnitine        | Glutamate          | Serotonin                   |              | Lyso Phosphatidylcholine acyl C20:3 | Phosphatidylcholine diacyl C34:2  |
| Tetradecenoylcarnitine   | Glycine            | Spermidine                  |              | Lyso Phosphatidylcholine acyl C20:4 | Phosphatidylcholine diacyl C34:3  |
| Tetradecadienylcarnitine | Histidine          | Spermine                    |              |                                     | Phosphatidylcholine diacyl C34:4  |
| Hexadecanoylcarnitine    | Isoleucine         | Taurine                     |              |                                     | Phosphatidylcholine diacyl C36:0  |
| Ocatdecanoylcarnitine    | Leucine            |                             |              |                                     | Phosphatidylcholine diacyl C36:1  |
| Octadecenoylcarnitine    | Lysine             |                             |              |                                     | Phosphatidylcholine diacyl C36:2  |
| Octadecadienylcarnitine  | Methionine         |                             |              |                                     | Phosphatidylcholine diacyl C36:3  |
|                          | Ornithine          |                             |              |                                     | Phosphatidylcholine diacyl C36:4  |
|                          | Phenylalanine      |                             |              |                                     | Phosphatidylcholine diacyl C36:5  |
|                          | Proline            |                             |              |                                     | Phosphatidylcholine diacyl C36:6  |
|                          | Serine             |                             |              |                                     | Phosphatidylcholine diacyl C38:0  |
|                          | Threonine          |                             |              |                                     | Phosphatidylcholine diacyl C38:1  |
|                          | Tryptophan         |                             |              |                                     | Phosphatidylcholine diacyl C38:3  |
|                          | Tyrosine           |                             |              |                                     | Phosphatidylcholine diacyl C38:4  |
|                          | Valine             |                             |              |                                     | Phosphatidylcholine diacyl C38:5  |
|                          |                    |                             |              |                                     | Phosphatidylcholine diacyl C38:6  |
|                          |                    |                             |              |                                     | Phosphatidylcholine diacyl C40:1  |
|                          |                    |                             |              |                                     | Phosphatidylcholine diacyl C40:2  |
|                          |                    |                             |              |                                     | Phosphatidylcholine diacyl C40:3  |
|                          |                    |                             |              |                                     | Phosphatidylcholine diacyl C40:4  |
|                          |                    |                             |              |                                     | Phosphatidylcholine diacyl C40:5  |
|                          |                    |                             |              |                                     | Phosphatidylcholine diacyl C40:6  |
|                          |                    |                             |              |                                     | Phosphatidylcholine diacyl C42:0  |
|                          |                    |                             |              |                                     | Phosphatidylcholine diacyl C42:1  |
|                          |                    |                             |              |                                     | Phosphatidylcholine diacyl C42:2  |
|                          |                    |                             |              |                                     | Phosphatidylcholine diacyl C42:4  |
|                          |                    |                             |              |                                     | Phosphatidylcholine diacyl C42:5  |
|                          |                    |                             |              |                                     | Phosphatidylcholine diacyl C42:6  |

KARE, the Korea Association Resource

Table S1. List of 135 serum metabolites in the KARE cohort (Continued)

| <b>Phosphatidylcholine acyl-alkyl</b> | <b>Sphingolipids</b>       |
|---------------------------------------|----------------------------|
| Phosphatidylcholine acyl-alkyl C30:0  | Hydroxysphingomyelin C14:1 |
| Phosphatidylcholine acyl-alkyl C32:1  | Hydroxysphingomyelin C16:1 |
| Phosphatidylcholine acyl-alkyl C32:2  | Hydroxysphingomyelin C22:1 |
| Phosphatidylcholine acyl-alkyl C34:0  | Hydroxysphingomyelin C22:2 |
| Phosphatidylcholine acyl-alkyl C34:1  | Hydroxysphingomyelin C24:1 |
| Phosphatidylcholine acyl-alkyl C34:2  | Sphingomyelin C16:0        |
| Phosphatidylcholine acyl-alkyl C34:3  | Sphingomyelin C16:1        |
| Phosphatidylcholine acyl-alkyl C36:0  | Sphingomyelin C18:0        |
| Phosphatidylcholine acyl-alkyl C36:1  | Sphingomyelin C18:1        |
| Phosphatidylcholine acyl-alkyl C36:2  | Sphingomyelin C24:0        |
| Phosphatidylcholine acyl-alkyl C36:3  | Sphingomyelin C24:1        |
| Phosphatidylcholine acyl-alkyl C36:4  | Sphingomyelin C26:1        |
| Phosphatidylcholine acyl-alkyl C36:5  |                            |
| Phosphatidylcholine acyl-alkyl C38:0  |                            |
| Phosphatidylcholine acyl-alkyl C38:1  |                            |
| Phosphatidylcholine acyl-alkyl C38:2  |                            |
| Phosphatidylcholine acyl-alkyl C38:3  |                            |
| Phosphatidylcholine acyl-alkyl C38:4  |                            |
| Phosphatidylcholine acyl-alkyl C38:5  |                            |
| Phosphatidylcholine acyl-alkyl C38:6  |                            |
| Phosphatidylcholine acyl-alkyl C40:1  |                            |
| Phosphatidylcholine acyl-alkyl C40:2  |                            |
| Phosphatidylcholine acyl-alkyl C40:3  |                            |
| Phosphatidylcholine acyl-alkyl C40:4  |                            |
| Phosphatidylcholine acyl-alkyl C40:5  |                            |
| Phosphatidylcholine acyl-alkyl C40:6  |                            |
| Phosphatidylcholine acyl-alkyl C42:0  |                            |
| Phosphatidylcholine acyl-alkyl C42:1  |                            |
| Phosphatidylcholine acyl-alkyl C42:2  |                            |
| Phosphatidylcholine acyl-alkyl C42:3  |                            |
| Phosphatidylcholine acyl-alkyl C42:4  |                            |
| Phosphatidylcholine acyl-alkyl C42:5  |                            |
| Phosphatidylcholine acyl-alkyl C44:3  |                            |
| Phosphatidylcholine acyl-alkyl C44:4  |                            |
| Phosphatidylcholine acyl-alkyl C44:5  |                            |
| Phosphatidylcholine acyl-alkyl C44:6  |                            |

KARE, the Korea Association Resource

Table S2. Genome-wide association study-derived genetic variants in the K-CHIP consortium

| Chr     | BP        | SNP         | Function   | Gene                   | Alleles | MAF   | Beta (SE)      | P-value  |
|---------|-----------|-------------|------------|------------------------|---------|-------|----------------|----------|
| 7q33    | 135579485 | rs12674250  | intergenic | FAM180A;LUZP6          | C/T     | 0.014 | -6.632 (1.060) | 7.20E-09 |
| 7q33    | 135578048 | rs71539472  | intergenic | FAM180A;LUZP6          | G/C     | 0.014 | -6.630 (1.060) | 7.26E-09 |
| 7q33    | 135578725 | rs11773428  | intergenic | FAM180A;LUZP6          | G/T     | 0.014 | -6.631 (1.060) | 7.28E-09 |
| 7q33    | 135572294 | rs12670070  | intergenic | FAM180A;LUZP6          | C/T     | 0.014 | -6.622 (1.060) | 7.54E-09 |
| 11q22.3 | 105427302 | rs117713934 | intergenic | CARD18;GRIA4           | T/G     | 0.035 | -4.126 (0.663) | 8.40E-09 |
| 7q33    | 135567068 | rs2348907   | intergenic | FAM180A;LUZP6          | A/C     | 0.013 | -6.576 (1.060) | 9.43E-09 |
| 7q33    | 135570157 | rs11762987  | intergenic | FAM180A;LUZP6          | A/G     | 0.013 | -6.577 (1.061) | 9.48E-09 |
| 7q33    | 135527463 | rs71539459  | intergenic | FAM180A;LUZP6          | A/C     | 0.013 | -6.562 (1.059) | 9.65E-09 |
| 7q33    | 135531147 | rs71539462  | intergenic | FAM180A;LUZP6          | T/C     | 0.013 | -6.562 (1.059) | 9.69E-09 |
| 7q33    | 135551217 | rs79466054  | intergenic | FAM180A;LUZP6          | C/T     | 0.013 | -6.562 (1.059) | 9.71E-09 |
| 7q33    | 135537495 | rs11975634  | intergenic | FAM180A;LUZP6          | A/G     | 0.013 | -6.561 (1.059) | 9.75E-09 |
| 7q33    | 135520471 | rs56244135  | intergenic | FAM180A;LUZP6          | T/C     | 0.013 | -6.542 (1.060) | 1.10E-08 |
| 14q31.1 | 83299627  | rs117363978 | intergenic | LINC02301;NONE         | G/A     | 0.029 | -5.293 (0.862) | 1.27E-08 |
| 7q33    | 135490878 | rs11766426  | intergenic | FAM180A;LUZP6          | C/G     | 0.014 | -6.504 (1.063) | 1.38E-08 |
| 7q33    | 135539970 | rs60112348  | intergenic | FAM180A;LUZP6          | A/G     | 0.012 | -6.789 (1.113) | 1.52E-08 |
| 15q26.1 | 89195127  | rs111437463 | UTR5       | ISG20                  | G/A     | 0.008 | -9.620 (1.595) | 2.08E-08 |
| 15q13.3 | 33261838  | rs7168080   | intronic   | FMN1                   | T/C     | 0.027 | -4.511 (0.750) | 2.26E-08 |
| 22q12.2 | 30757436  | rs79247733  | intronic   | CCDC157                | G/A     | 0.087 | -2.734 (0.456) | 2.44E-08 |
| 15q13.3 | 33262276  | rs60847748  | intronic   | FMN1                   | G/C     | 0.028 | -4.487 (0.748) | 2.46E-08 |
| 3q24    | 143157268 | rs13093275  | intronic   | SLC9A9                 | G/T     | 0.113 | -2.304 (0.389) | 3.53E-08 |
| 15q26.1 | 93906143  | rs148163587 | intergenic | LOC105370980;LINC02207 | C/T     | 0.013 | -6.334 (1.071) | 3.65E-08 |
| 3p26.2  | 3175601   | rs149885665 | intronic   | TRNT1                  | C/T     | 0.010 | -7.688 (1.307) | 4.19E-08 |

Chr, chromosome; SNP, single nucleotide polymorphisms; MAF, minor allele frequency; SE, standard error; K-CHIP, the Korea Biobank Array

Table S2. Genome-wide association study-derived genetic variants in the K-CHIP consortium (Continued)

| Chr     | BP        | SNP         | Function   | Gene                   | Alleles | MAF   | Beta (SE)            | P-value  |
|---------|-----------|-------------|------------|------------------------|---------|-------|----------------------|----------|
| 3q29    | 195847118 | rs145588336 | intergenic | TFRC;LINC00885         | C/T     | 0.048 | -3.406 (0.582)       | 4.85E-08 |
| 11p15.4 | 9650309   | rs117764660 | intergenic | WEE1;SWAP70            | A/G     | 0.009 | -7.626 (1.311)       | 5.72E-08 |
| 12q23.1 | 98213754  | rs139661669 | intergenic | LOC643711;MIR4495      | T/G     | 0.009 | -7.626 (1.311)       | 5.72E-08 |
| 4q28.1  | 127056018 | rs149461767 | intergenic | MIR2054;INTU           | C/G     | 0.013 | -7.011 (1.206)       | 5.75E-08 |
| 15q26.1 | 93888877  | rs955690599 | intergenic | LOC105370980;LINC02207 | C/T     | 0.014 | -6.316 (1.089)       | 6.08E-08 |
| 11p13   | 34728253  | rs184451962 | intergenic | EHF;APIP               | G/A     | 0.000 | -541.650 ( 93.367)   | 6.10E-08 |
| 4q28.1  | 127191674 | rs75153312  | intergenic | MIR2054;INTU           | T/A     | 0.011 | -7.555 (1.303)       | 6.14E-08 |
| 12q23.1 | 98211000  | rs79833465  | intergenic | LOC643711;MIR4495      | T/C     | 0.009 | -7.612 (1.313)       | 6.15E-08 |
| 18q22.2 | 67318159  | rs73463973  | intronic   | DOK6                   | A/G     | 0.115 | -2.110 (0.364)       | 6.38E-08 |
| 15q24.3 | 77336133  | rs118012826 | UTR3       | TSPAN3                 | G/A     | 0.027 | -4.485 (0.779)       | 7.38E-08 |
| 10q21.1 | 53171297  | rs117744777 | intronic   | PRKG1                  | C/T     | 0.000 | -7739.970 (1346.350) | 7.76E-08 |
| 11p13   | 34737478  | rs187796610 | intergenic | EHF;APIP               | A/G     | 0.000 | -540.784 ( 94.068)   | 7.76E-08 |
| 3p24.3  | 21653781  | rs147909135 | intronic   | ZNF385D                | G/A     | 0.009 | -7.555 (1.315)       | 7.90E-08 |
| 7q33    | 135549647 | rs11764776  | intergenic | FAM180A;LUZP6          | C/A     | 0.009 | -7.558 (1.316)       | 7.91E-08 |
| 9q31.1  | 104899256 | rs150890582 | intergenic | GRIN3A;LINC00587       | G/A     | 0.009 | -7.553 (1.315)       | 7.96E-08 |
| 16q22.1 | 69186529  | rs557474024 | intronic   | UTP4                   | C/T     | 0.008 | -8.489 (1.485)       | 8.97E-08 |
| 2q22.1  | 138442200 | rs549533033 | intergenic | THSD7B;LOC101928273    | G/A     | 0.008 | -8.487 (1.489)       | 9.68E-08 |
| 2q22.1  | 138442195 | rs567460414 | intergenic | THSD7B;LOC101928273    | A/G     | 0.008 | -8.487 (1.489)       | 9.68E-08 |
| 7p15.3  | 21587183  | rs201198710 | intronic   | DNAH11                 | ATAAT/A | 0.011 | -7.470 (1.315)       | 1.06E-07 |
| 3q29    | 195809725 | rs17091661  | upstream   | TFRC                   | C/G     | 0.052 | -3.234 (0.569)       | 1.07E-07 |
| 13q13.3 | 36255134  | rs142727278 | intergenic | NBEA;LINC00445         | C/T     | 0.017 | -5.902 (1.042)       | 1.15E-07 |
| 3q29    | 192624876 | rs116204719 | intronic   | MB21D2                 | A/T     | 0.009 | -7.474 (1.320)       | 1.15E-07 |

Chr, chromosome; SNP, single nucleotide polymorphisms; MAF, minor allele frequency; SE, standard error; K-CHIP, the Korea Biobank Array

Table S2. Genome-wide association study-derived genetic variants in the K-CHIP consortium (Continued)



| Chr      | BP        | SNP          | Function   | Gene          | Alleles | MAF   | Beta (SE)      | P-value  |
|----------|-----------|--------------|------------|---------------|---------|-------|----------------|----------|
| 3p12.3   | 77523031  | rs145860157  | intronic   | ROBO2         | A/C     | 0.009 | -7.469 (1.319) | 1.15E-07 |
| 8q21.13  | 81610194  | rs148850681  | intronic   | ZNF704        | T/C     | 0.009 | -7.469 (1.319) | 1.15E-07 |
| 18p11.21 | 13719612  | rs184493441  | intronic   | FAM210A       | T/C     | 0.009 | -7.469 (1.319) | 1.15E-07 |
| 3q27.2   | 185140359 | rs76390866   | intronic   | MAP3K13       | C/T     | 0.009 | -7.469 (1.319) | 1.15E-07 |
| 3q29     | 192617374 | rs141743783  | intronic   | MB21D2        | A/G     | 0.009 | -7.472 (1.320) | 1.16E-07 |
| 3q29     | 192621063 | rs79926231   | intronic   | MB21D2        | G/T     | 0.009 | -7.472 (1.320) | 1.16E-07 |
| 3q29     | 192623144 | rs115525172  | intronic   | MB21D2        | G/A     | 0.009 | -7.471 (1.320) | 1.16E-07 |
| 3q29     | 192627068 | rs11921144   | intronic   | MB21D2        | A/T     | 0.009 | -7.471 (1.320) | 1.16E-07 |
| 3q29     | 192626691 | rs79654963   | intronic   | MB21D2        | A/T     | 0.009 | -7.471 (1.320) | 1.16E-07 |
| 3q29     | 192614938 | rs138060225  | intronic   | MB21D2        | A/C     | 0.009 | -7.468 (1.319) | 1.17E-07 |
| 3q29     | 192621921 | rs77225906   | intronic   | MB21D2        | G/C     | 0.009 | -7.470 (1.320) | 1.17E-07 |
| 3q29     | 192630923 | rs73198800   | intronic   | MB21D2        | T/C     | 0.009 | -7.464 (1.320) | 1.19E-07 |
| 6p11.2   | 57281388  | rs575341105  | intronic   | PRIM2         | G/C     | 0.009 | -7.712 (1.364) | 1.20E-07 |
| 7p15.3   | 21580775  | rs115451224  | intergenic | SP4;DNAH11    | G/T     | 0.009 | -7.463 (1.321) | 1.21E-07 |
| 11p13    | 32360746  | rs55767723   | intergenic | SNORA88;WT1   | C/T     | 0.012 | -7.120 (1.260) | 1.22E-07 |
| 7p15.3   | 21583910  | rs56688731   | intronic   | DNAH11        | T/G     | 0.009 | -7.458 (1.321) | 1.24E-07 |
| 6q25.1   | 150329057 | rs185234953  | intergenic | RAET1K;RAET1L | A/G     | 0.024 | -4.892 (0.867) | 1.25E-07 |
| 2p16.1   | 57600654  | rs147118782  | intergenic | CCDC85A;VRK2  | T/C     | 0.010 | -8.573 (1.519) | 1.25E-07 |
| 6p11.2   | 57324187  | rs1192133075 | intronic   | PRIM2         | A/C     | 0.009 | -7.919 (1.404) | 1.26E-07 |
| 6p11.2   | 57325078  | rs994418306  | intronic   | PRIM2         | G/A     | 0.009 | -7.922 (1.404) | 1.26E-07 |
| 6p11.2   | 57326277  | rs1179007536 | intronic   | PRIM2         | C/T     | 0.009 | -7.926 (1.405) | 1.27E-07 |
| 6p11.2   | 57325945  | rs1397294397 | intronic   | PRIM2         | A/G     | 0.009 | -7.926 (1.405) | 1.27E-07 |

Chr, chromosome; SNP, single nucleotide polymorphisms; MAF, minor allele frequency; SE, standard error; K-CHIP, the Korea Biobank Array

Table S2. Genome-wide association study-derived genetic variants in the K-CHIP consortium (Continued)

| Chr     | BP        | SNP          | Function       | Gene                | Alleles | MAF   | Beta (SE)          | P-value  |
|---------|-----------|--------------|----------------|---------------------|---------|-------|--------------------|----------|
| 6p11.2  | 57328179  | rs1218145796 | intronic       | PRIM2               | A/G     | 0.009 | -7.930 (1.406)     | 1.27E-07 |
| 6p11.2  | 57327372  | rs1294551034 | intronic       | PRIM2               | A/T     | 0.009 | -7.930 (1.406)     | 1.27E-07 |
| 6p11.2  | 57327572  | rs1319926816 | intronic       | PRIM2               | G/T     | 0.009 | -7.930 (1.406)     | 1.27E-07 |
| 6p11.2  | 57330616  | rs1334057224 | intronic       | PRIM2               | T/G     | 0.009 | -7.937 (1.407)     | 1.27E-07 |
| 6p11.2  | 57330720  | rs761503009  | intronic       | PRIM2               | A/C     | 0.009 | -7.937 (1.407)     | 1.27E-07 |
| 15q26.1 | 89197517  | rs141786963  | intronic       | ISG20               | C/T     | 0.022 | -5.985 (1.062)     | 1.28E-07 |
| 5q21.3  | 108575881 | rs80194513   | ncRNA_intronic | LOC285638           | T/C     | 0.003 | -49.798 (8.840)    | 1.31E-07 |
| 4p16.1  | 11150684  | rs375628754  | intergenic     | CLNK;MIR572         | G/T     | 0.036 | -3.913 (0.696)     | 1.38E-07 |
| 3q29    | 195804208 | rs17091588   | intronic       | TFRC                | A/G     | 0.052 | -3.181 (0.566)     | 1.38E-07 |
| 3q29    | 195798320 | rs41301381   | exonic         | TFRC                | G/C     | 0.052 | -3.172 (0.565)     | 1.44E-07 |
| 5p15.33 | 3278879   | rs372457561  | intergenic     | LINC01377;LINC01019 | T/C     | 0.022 | -5.131 (0.915)     | 1.49E-07 |
| 3p24.1  | 27705156  | rs536262664  | intergenic     | SLC4A7;EOMES        | C/T     | 0.000 | -312.603 (56.097)  | 1.73E-07 |
| 13q34   | 112170827 | rs139027045  | intergenic     | TEX29;LINC02337     | C/T     | 0.010 | -7.885 (1.417)     | 1.80E-07 |
| 5p15.2  | 13361785  | rs138135958  | intergenic     | LINC02220;DNAH5     | G/T     | 0.017 | -5.730 (1.030)     | 1.80E-07 |
| 1p33    | 49684590  | rs185947935  | intronic       | AGBL4               | C/T     | 0.013 | -6.262 (1.128)     | 1.91E-07 |
| 3p24.1  | 29770237  | rs79101590   | intronic       | RBMS3               | T/C     | 0.024 | -4.940 (0.891)     | 1.98E-07 |
| 20q13.2 | 50168870  | rs188208200  | intronic       | NFATC2              | C/T     | 0.010 | -7.341 (1.325)     | 1.99E-07 |
| 5q21.1  | 102568853 | rs75498191   | intergenic     | PPIP5K2;C5orf30     | A/G     | 0.000 | -777.631 (140.453) | 2.03E-07 |
| 1p33    | 49659599  | rs117205909  | intronic       | AGBL4               | C/T     | 0.013 | -6.291 (1.137)     | 2.07E-07 |
| 1p33    | 49657256  | rs184839480  | intronic       | AGBL4               | T/C     | 0.013 | -6.295 (1.138)     | 2.10E-07 |
| 15q26.1 | 89180627  | rs148556246  | intronic       | ISG20               | C/T     | 0.017 | -5.226 (0.946)     | 2.17E-07 |
| 12q23.3 | 108894982 | rs11113949   | intergenic     | LINC01498;FICD      | G/A     | 0.010 | -7.266 (1.316)     | 2.19E-07 |

Chr, chromosome; SNP, single nucleotide polymorphisms; MAF, minor allele frequency; SE, standard error; K-CHIP, the Korea Biobank Array

Table S2. Genome-wide association study-derived genetic variants in the K-CHIP consortium (Continued)

| Chr     | BP        | SNP         | Function   | Gene           | Alleles | MAF   | Beta (SE)      | P-value  |
|---------|-----------|-------------|------------|----------------|---------|-------|----------------|----------|
| 12q23.3 | 108895133 | rs11113950  | intergenic | LINC01498;FICD | A/C     | 0.010 | -7.266 (1.316) | 2.19E-07 |
| 12q23.3 | 108894645 | rs11113946  | intergenic | LINC01498;FICD | C/A     | 0.010 | -7.266 (1.316) | 2.19E-07 |
| 12q23.3 | 108894695 | rs11113947  | intergenic | LINC01498;FICD | A/G     | 0.010 | -7.266 (1.316) | 2.19E-07 |
| 12q23.3 | 108894518 | rs11113945  | intergenic | LINC01498;FICD | T/C     | 0.010 | -7.265 (1.316) | 2.20E-07 |
| 12q23.3 | 108894433 | rs12367034  | intergenic | LINC01498;FICD | G/A     | 0.010 | -7.265 (1.316) | 2.20E-07 |
| 12q23.3 | 108895874 | rs11113951  | intergenic | LINC01498;FICD | A/G     | 0.010 | -7.265 (1.317) | 2.20E-07 |
| 7p15.3  | 21630394  | rs143123989 | intronic   | DNAH11         | A/T     | 0.009 | -8.086 (1.466) | 2.22E-07 |
| 12q23.3 | 108896797 | rs11113953  | intergenic | LINC01498;FICD | C/T     | 0.010 | -7.263 (1.317) | 2.22E-07 |
| 12q23.3 | 108893730 | rs11113944  | intergenic | LINC01498;FICD | T/C     | 0.010 | -7.262 (1.316) | 2.22E-07 |
| 12q23.3 | 108893870 | rs77449249  | intergenic | LINC01498;FICD | A/T     | 0.010 | -7.262 (1.316) | 2.22E-07 |
| 12q23.3 | 108893479 | rs11113940  | intergenic | LINC01498;FICD | T/A     | 0.010 | -7.261 (1.316) | 2.23E-07 |
| 12q23.3 | 108893524 | rs11113941  | intergenic | LINC01498;FICD | C/T     | 0.010 | -7.261 (1.316) | 2.23E-07 |
| 12q23.3 | 108893600 | rs11113942  | intergenic | LINC01498;FICD | G/T     | 0.010 | -7.261 (1.316) | 2.23E-07 |
| 12q23.3 | 108897590 | rs11113956  | intergenic | LINC01498;FICD | C/A     | 0.010 | -7.263 (1.317) | 2.23E-07 |
| 12q23.3 | 108893722 | rs11113943  | intergenic | LINC01498;FICD | G/A     | 0.010 | -7.261 (1.316) | 2.23E-07 |
| 12q23.3 | 108893341 | rs11113939  | intergenic | LINC01498;FICD | G/A     | 0.010 | -7.260 (1.316) | 2.24E-07 |
| 12q23.3 | 108893177 | rs11113936  | intergenic | LINC01498;FICD | T/G     | 0.010 | -7.260 (1.316) | 2.24E-07 |
| 12q23.3 | 108893204 | rs11113937  | intergenic | LINC01498;FICD | G/T     | 0.010 | -7.260 (1.316) | 2.24E-07 |
| 12q23.3 | 108893248 | rs11113938  | intergenic | LINC01498;FICD | T/G     | 0.010 | -7.260 (1.316) | 2.24E-07 |
| 12q23.3 | 108892840 | rs11113935  | intergenic | LINC01498;FICD | C/T     | 0.010 | -7.259 (1.317) | 2.25E-07 |
| 12q23.3 | 108892921 | rs199953283 | intergenic | LINC01498;FICD | A/AT    | 0.010 | -7.259 (1.317) | 2.25E-07 |
| 12q23.3 | 108892623 | rs11113932  | intergenic | LINC01498;FICD | A/G     | 0.010 | -7.258 (1.317) | 2.26E-07 |

Chr, chromosome; SNP, single nucleotide polymorphisms; MAF, minor allele frequency; SE, standard error; K-CHIP, the Korea Biobank Array

Table S2. Genome-wide association study-derived genetic variants in the K-CHIP consortium (Continued)

| Chr      | BP        | SNP         | Function   | Gene           | Alleles | MAF   | Beta (SE)      | P-value  |
|----------|-----------|-------------|------------|----------------|---------|-------|----------------|----------|
| 12q23.3  | 108892405 | rs11113930  | intergenic | LINC01498;FICD | C/T     | 0.010 | -7.258 (1.317) | 2.26E-07 |
| 12q23.3  | 108892085 | rs11113927  | intergenic | LINC01498;FICD | A/C     | 0.010 | -7.258 (1.317) | 2.26E-07 |
| 12q23.3  | 108892316 | rs11113928  | intergenic | LINC01498;FICD | T/A     | 0.010 | -7.258 (1.317) | 2.26E-07 |
| 12q23.3  | 108892317 | rs11113929  | intergenic | LINC01498;FICD | G/A     | 0.010 | -7.258 (1.317) | 2.26E-07 |
| 12q23.3  | 108892094 | rs138719215 | intergenic | LINC01498;FICD | A/AG    | 0.010 | -7.258 (1.317) | 2.26E-07 |
| 19q13.43 | 58196865  | rs967336174 | intronic   | ZNF551         | CCT/C   | 0.010 | -7.257 (1.317) | 2.27E-07 |
| 12q23.3  | 108891504 | rs12368931  | intergenic | LINC01498;FICD | A/G     | 0.010 | -7.256 (1.317) | 2.28E-07 |
| 12q23.3  | 108891644 | rs11113926  | intergenic | LINC01498;FICD | G/A     | 0.010 | -7.255 (1.317) | 2.28E-07 |
| 12q23.3  | 108891607 | rs12372268  | intergenic | LINC01498;FICD | C/A     | 0.010 | -7.255 (1.317) | 2.28E-07 |
| 12q23.3  | 108891441 | rs57853417  | intergenic | LINC01498;FICD | A/G     | 0.010 | -7.255 (1.317) | 2.29E-07 |
| 12q23.3  | 108898482 | rs57507907  | intergenic | LINC01498;FICD | T/A     | 0.010 | -7.257 (1.317) | 2.29E-07 |
| 12q23.3  | 108890795 | rs200436713 | intergenic | LINC01498;FICD | T/TA    | 0.010 | -7.252 (1.317) | 2.31E-07 |
| 12q23.3  | 108890835 | rs11113924  | intergenic | LINC01498;FICD | T/A     | 0.010 | -7.251 (1.317) | 2.32E-07 |
| 15q26.1  | 89173098  | rs150509619 | intronic   | AEN            | A/C     | 0.018 | -5.277 (0.958) | 2.32E-07 |
| 12q23.3  | 108890649 | rs76473093  | intergenic | LINC01498;FICD | G/C     | 0.010 | -7.251 (1.317) | 2.32E-07 |
| 12q23.3  | 108890651 | rs77258936  | intergenic | LINC01498;FICD | T/A     | 0.010 | -7.251 (1.317) | 2.32E-07 |
| 12q23.3  | 108898481 | rs56999150  | intergenic | LINC01498;FICD | C/A     | 0.011 | -7.252 (1.318) | 2.35E-07 |
| 12q23.3  | 108898892 | rs60988999  | intergenic | LINC01498;FICD | C/A     | 0.010 | -7.251 (1.318) | 2.36E-07 |
| 12q23.3  | 108890137 | rs76822917  | intergenic | LINC01498;FICD | A/G     | 0.010 | -7.246 (1.317) | 2.36E-07 |
| 12q23.3  | 108890022 | rs77049190  | intergenic | LINC01498;FICD | T/C     | 0.010 | -7.246 (1.317) | 2.36E-07 |
| 12q23.3  | 108890022 | rs77049190  | intergenic | LINC01498;FICD | T/C     | 0.010 | -7.246 (1.317) | 2.36E-07 |
| 12q23.3  | 108889920 | rs79379950  | intergenic | LINC01498;FICD | A/G     | 0.010 | -7.243 (1.317) | 2.39E-07 |

Chr, chromosome; SNP, single nucleotide polymorphisms; MAF, minor allele frequency; SE, standard error; K-CHIP, the Korea Biobank Array

Table S2. Genome-wide association study-derived genetic variants in the K-CHIP consortium (Continued)

| Chr      | BP        | SNP          | Function            | Gene             | Alleles | MAF   | Beta (SE)      | P-value  |
|----------|-----------|--------------|---------------------|------------------|---------|-------|----------------|----------|
| 1q43     | 240811124 | rs565547003  | intergenic          | GREM2;RGS7       | A/G     | 0.012 | -6.624 (1.209) | 2.62E-07 |
| 5p15.2   | 13341420  | rs142344584  | intergenic          | LINC02220;DNAH5  | A/G     | 0.017 | -5.681 (1.037) | 2.64E-07 |
| 12q24.33 | 130982880 | rs55762517   | intronic            | RIMBP2           | G/A     | 0.015 | -6.217 (1.135) | 2.64E-07 |
| 13q31.1  | 79187459  | rs1180870680 | ncRNA_intronic      | OBI1-AS1         | T/C     | 0.026 | -4.123 (0.754) | 2.74E-07 |
| 17p13.2  | 6091502   | rs116979438  | intergenic          | WSCD1;AIPL1      | T/C     | 0.013 | -5.952 (1.091) | 2.89E-07 |
| 1q43     | 239701246 | rs16838444   | intronic            | CHRM3            | T/G     | 0.013 | -5.952 (1.091) | 2.89E-07 |
| 12q24.33 | 130984960 | rs60921151   | intronic            | RIMBP2           | G/A     | 0.015 | -6.146 (1.127) | 2.97E-07 |
| 4q32.3   | 164687231 | rs12505111   | intronic            | MARCHF1          | A/G     | 0.027 | -4.253 (0.782) | 3.12E-07 |
| 1q21.3   | 151012068 | rs115422057  | intronic            | BNIP1            | G/A     | 0.010 | -7.387 (1.362) | 3.36E-07 |
| 9q31.1   | 104627355 | rs10989665   | intergenic          | GRIN3A;LINC00587 | A/C     | 0.045 | -3.442 (0.635) | 3.40E-07 |
| 12q24.33 | 130985984 | rs66756436   | intronic            | RIMBP2           | G/A     | 0.015 | -6.064 (1.123) | 3.76E-07 |
| 1q21.3   | 151013099 | rs151070704  | intronic            | BNIP1            | C/T     | 0.010 | -7.363 (1.364) | 3.78E-07 |
| 1q21.3   | 151014400 | rs146753684  | intronic            | BNIP1            | A/G     | 0.010 | -7.363 (1.365) | 3.81E-07 |
| 1q21.3   | 151015174 | rs117770722  | intronic            | BNIP1            | C/T     | 0.010 | -7.362 (1.365) | 3.84E-07 |
| 2q36.1   | 222176106 | rs72952909   | intergenic          | MIR4268;EPHA4    | A/G     | 0.086 | -2.375 (0.441) | 3.98E-07 |
| 8p23.2   | 4820233   | rs146823031  | intronic            | CSMD1            | T/C     | 0.012 | -6.945 (1.290) | 4.05E-07 |
| 1q21.3   | 151008914 | rs115270318  | upstream;downstream | BNIP1;PRUNE1     | T/A     | 0.010 | -7.359 (1.368) | 4.12E-07 |
| 2q36.1   | 222178867 | rs1430246    | intergenic          | MIR4268;EPHA4    | A/G     | 0.086 | -2.367 (0.440) | 4.19E-07 |
| 2q36.1   | 222182550 | rs16862493   | intergenic          | MIR4268;EPHA4    | C/G     | 0.086 | -2.355 (0.439) | 4.44E-07 |
| 1q21.3   | 151007574 | rs12070466   | UTR3                | PRUNE1           | G/C     | 0.011 | -7.347 (1.372) | 4.58E-07 |
| 2q36.1   | 222190938 | rs72952942   | intergenic          | MIR4268;EPHA4    | C/T     | 0.087 | -2.328 (0.435) | 4.60E-07 |
| 2q36.1   | 222191045 | rs16862504   | intergenic          | MIR4268;EPHA4    | G/A     | 0.087 | -2.328 (0.435) | 4.61E-07 |

Chr, chromosome; SNP, single nucleotide polymorphisms; MAF, minor allele frequency; SE, standard error; K-CHIP, the Korea Biobank Array

Table S2. Genome-wide association study-derived genetic variants in the K-CHIP consortium (Continued)

| Chr     | BP        | SNP         | Function       | Gene             | Alleles | MAF   | Beta (SE)      | P-value  |
|---------|-----------|-------------|----------------|------------------|---------|-------|----------------|----------|
| 4q13.3  | 72010245  | rs375674565 | intergenic     | DCK;SLC4A4       | T/G     | 0.028 | -4.228 (0.790) | 4.63E-07 |
| 4q32.3  | 164684385 | rs13127646  | intronic       | MARCHF1          | G/A     | 0.027 | -4.205 (0.786) | 4.65E-07 |
| 4q28.1  | 127035452 | rs117610704 | intergenic     | MIR2054;INTU     | A/G     | 0.010 | -7.848 (1.467) | 4.70E-07 |
| 2q36.1  | 222186825 | rs16862499  | intergenic     | MIR4268;EPA4     | A/T     | 0.087 | -2.336 (0.437) | 4.71E-07 |
| 2q36.1  | 222187315 | rs16862501  | intergenic     | MIR4268;EPA4     | G/A     | 0.087 | -2.335 (0.437) | 4.74E-07 |
| 2q36.1  | 222185906 | rs72952930  | intergenic     | MIR4268;EPA4     | C/T     | 0.087 | -2.338 (0.438) | 4.85E-07 |
| 9q31.1  | 104638232 | rs10989675  | intergenic     | GRIN3A;LINC00587 | G/A     | 0.044 | -3.341 (0.625) | 4.85E-07 |
| 3q27.2  | 184792192 | rs79424017  | intergenic     | VPS8;C3orf70     | C/T     | 0.014 | -5.823 (1.092) | 5.04E-07 |
| 9q31.1  | 104639683 | rs12238882  | intergenic     | GRIN3A;LINC00587 | C/T     | 0.044 | -3.325 (0.624) | 5.11E-07 |
| 11q13.2 | 68116010  | rs112180284 | intronic       | LRP5             | T/C     | 0.020 | -5.100 (0.957) | 5.15E-07 |
| 3q27.2  | 184908072 | rs183410169 | ncRNA_intronic | EHHADH-AS1       | T/C     | 0.008 | -8.731 (1.641) | 5.33E-07 |
| 2q36.1  | 222191393 | rs6748878   | intergenic     | MIR4268;EPA4     | A/T     | 0.088 | -2.324 (0.438) | 5.74E-07 |
| 4q21.1  | 76527346  | rs111466342 | intronic       | CDKL2            | G/GT    | 0.052 | -3.092 (0.583) | 5.75E-07 |
| 9q31.1  | 104642966 | rs9299352   | intergenic     | GRIN3A;LINC00587 | C/T     | 0.044 | -3.289 (0.621) | 5.79E-07 |
| 1p33    | 49542012  | rs190235218 | intronic       | AGBL4            | C/T     | 0.012 | -6.468 (1.222) | 5.95E-07 |
| 14q31.1 | 83551687  | rs77734808  | intergenic     | LINC02301;NONE   | G/A     | 0.016 | -6.224 (1.176) | 5.98E-07 |
| 9q31.1  | 104645652 | rs10989682  | intergenic     | GRIN3A;LINC00587 | G/T     | 0.044 | -3.286 (0.621) | 6.13E-07 |
| 2q36.1  | 222184970 | rs72952924  | intergenic     | MIR4268;EPA4     | A/G     | 0.086 | -2.332 (0.441) | 6.26E-07 |
| 15q26.1 | 89124390  | rs150320390 | intergenic     | DET1;LINC01586   | G/T     | 0.010 | -7.572 (1.434) | 6.30E-07 |
| 1p34.3  | 38079825  | rs117174295 | intronic       | RSPO1            | C/T     | 0.026 | -4.178 (0.792) | 6.43E-07 |
| 4q32.3  | 164691345 | rs10013393  | intronic       | MARCHF1          | T/G     | 0.035 | -3.645 (0.691) | 6.51E-07 |
| 1p33    | 49501403  | rs140975530 | intronic       | AGBL4            | T/G     | 0.012 | -6.463 (1.226) | 6.54E-07 |

Chr, chromosome; SNP, single nucleotide polymorphisms; MAF, minor allele frequency; SE, standard error; K-CHIP, the Korea Biobank Array

Table S2. Genome-wide association study-derived genetic variants in the K-CHIP consortium (Continued)

| Chr      | BP        | SNP         | Function       | Gene          | Alleles   | MAF   | Beta (SE)       | P-value  |
|----------|-----------|-------------|----------------|---------------|-----------|-------|-----------------|----------|
| 1q25.3   | 185746647 | rs61314460  | intronic       | HMCN1         | G/A       | 0.070 | -2.555 (0.485)  | 6.58E-07 |
| 3q21.3   | 126517078 | rs138613194 | intronic       | CHCHD6        | C/T       | 0.007 | -11.763 (2.233) | 6.66E-07 |
| 15q22.2  | 60473320  | rs140501799 | intergenic     | FOXB1;ANXA2   | A/G       | 0.030 | -3.857 (0.732)  | 6.70E-07 |
| 1p34.3   | 38095804  | rs12753021  | intronic       | RSPO1         | C/T       | 0.027 | -4.150 (0.788)  | 6.79E-07 |
| 1p33     | 49485775  | rs146366723 | intronic       | AGBL4         | T/C       | 0.012 | -6.475 (1.231)  | 6.91E-07 |
| 2q36.1   | 222191389 | rs200126617 | intergenic     | MIR4268;EPHA4 | A/T       | 0.087 | -2.322 (0.442)  | 7.13E-07 |
| 1p34.3   | 38097519  | rs71640742  | UTR5           | RSPO1         | A/C       | 0.026 | -4.137 (0.788)  | 7.18E-07 |
| 4q32.3   | 164704667 | rs10009600  | intronic       | MARCHF1       | G/C       | 0.035 | -3.615 (0.689)  | 7.26E-07 |
| 22q12.3  | 37122086  | rs16997246  | ncRNA_intronic | LOC105373021  | T/C       | 0.013 | -5.769 (1.099)  | 7.26E-07 |
| 4q32.3   | 164741639 | rs28637179  | intronic       | MARCHF1       | G/A       | 0.035 | -3.619 (0.690)  | 7.29E-07 |
| 4q32.3   | 164744895 | rs13103455  | intronic       | MARCHF1       | T/C       | 0.035 | -3.616 (0.689)  | 7.30E-07 |
| 4q32.3   | 164690172 | rs13146066  | intronic       | MARCHF1       | T/C       | 0.041 | -3.437 (0.655)  | 7.31E-07 |
| 4q32.3   | 164716627 | rs10030446  | intronic       | MARCHF1       | C/G       | 0.035 | -3.613 (0.689)  | 7.44E-07 |
| 1q41     | 221080599 | rs74957276  | intergenic     | HLX;C1orf140  | C/T       | 0.026 | -4.132 (0.788)  | 7.46E-07 |
| 1q41     | 221083429 | rs75369607  | intergenic     | HLX;C1orf140  | T/G       | 0.026 | -4.132 (0.788)  | 7.47E-07 |
| 13q14.11 | 42647779  | rs78735820  | intronic       | DGKH          | C/T       | 0.079 | -2.694 (0.514)  | 7.49E-07 |
| 4q32.3   | 164680214 | rs13136324  | intronic       | MARCHF1       | C/T       | 0.026 | -4.143 (0.791)  | 7.56E-07 |
| 4q32.3   | 164672601 | rs13105978  | intronic       | MARCHF1       | T/A       | 0.026 | -4.138 (0.790)  | 7.68E-07 |
| 4q32.3   | 164672948 | rs34162806  | intronic       | MARCHF1       | A/C       | 0.026 | -4.138 (0.790)  | 7.68E-07 |
| 4q32.3   | 164672979 | rs139079372 | intronic       | MARCHF1       | T/TGTGTGA | 0.026 | -4.138 (0.791)  | 7.71E-07 |
| 4q32.3   | 164707381 | rs4691934   | intronic       | MARCHF1       | G/A       | 0.035 | -3.632 (0.694)  | 7.78E-07 |
| 4q32.3   | 164714927 | rs7695742   | intronic       | MARCHF1       | T/C       | 0.035 | -3.632 (0.695)  | 7.93E-07 |

Chr, chromosome; SNP, single nucleotide polymorphisms; MAF, minor allele frequency; SE, standard error; K-CHIP, the Korea Biobank Array

Table S2. Genome-wide association study-derived genetic variants in the K-CHIP consortium (Continued)

| Chr      | BP        | SNP          | Function   | Gene          | Alleles | MAF   | Beta (SE)      | P-value  |
|----------|-----------|--------------|------------|---------------|---------|-------|----------------|----------|
| 13q12.13 | 27518236  | rs11618475   | intergenic | GPR12;USP12   | A/G     | 0.017 | -5.822 (1.114) | 7.97E-07 |
| 4q32.3   | 164670165 | rs13101998   | intronic   | MARCHF1       | G/T     | 0.026 | -4.134 (0.791) | 7.99E-07 |
| 4q32.3   | 164674901 | rs10009742   | intronic   | MARCHF1       | C/T     | 0.027 | -4.128 (0.790) | 8.01E-07 |
| 4q32.3   | 164670444 | rs1390835129 | intronic   | MARCHF1       | CT/C    | 0.027 | -4.129 (0.790) | 8.01E-07 |
| 3p24.1   | 29471087  | rs536791351  | intronic   | RBMS3         | A/C     | 0.018 | -5.590 (1.070) | 8.04E-07 |
| 4q32.3   | 164670375 | rs71600637   | intronic   | MARCHF1       | C/CAT   | 0.027 | -4.127 (0.790) | 8.08E-07 |
| 4q32.3   | 164719589 | rs7657245    | intronic   | MARCHF1       | G/A     | 0.035 | -3.631 (0.695) | 8.09E-07 |
| 21q22.12 | 37599375  | rs564113735  | intronic   | DOP1B         | G/C     | 0.008 | -8.378 (1.605) | 8.20E-07 |
| 18q12.3  | 39023592  | rs80352123   | intergenic | LINC01477;KC6 | T/A     | 0.190 | -1.950 (0.374) | 8.22E-07 |
| 4q32.3   | 164669428 | rs12504820   | intronic   | MARCHF1       | C/T     | 0.026 | -4.135 (0.792) | 8.26E-07 |
| 4q32.3   | 164668086 | rs13139036   | intronic   | MARCHF1       | G/A     | 0.026 | -4.131 (0.792) | 8.27E-07 |
| 4q32.3   | 164669328 | rs34491561   | intronic   | MARCHF1       | C/A     | 0.026 | -4.135 (0.792) | 8.27E-07 |
| 4q32.3   | 164668003 | rs17474074   | intronic   | MARCHF1       | G/T     | 0.026 | -4.130 (0.792) | 8.32E-07 |
| 4q32.3   | 164694482 | rs2201374    | intronic   | MARCHF1       | A/G     | 0.036 | -3.606 (0.691) | 8.34E-07 |
| 4q32.3   | 164667565 | rs12502759   | intronic   | MARCHF1       | G/A     | 0.026 | -4.129 (0.792) | 8.38E-07 |
| 4q32.3   | 164669067 | rs12512360   | intronic   | MARCHF1       | A/C     | 0.026 | -4.132 (0.793) | 8.45E-07 |
| 4q32.3   | 164666859 | rs17577474   | intronic   | MARCHF1       | G/A     | 0.026 | -4.128 (0.792) | 8.49E-07 |
| 4q32.3   | 164666401 | rs62333006   | intronic   | MARCHF1       | T/C     | 0.026 | -4.127 (0.792) | 8.53E-07 |
| 4q32.3   | 164665383 | rs6852270    | intronic   | MARCHF1       | C/T     | 0.027 | -4.116 (0.790) | 8.55E-07 |
| 4p16.1   | 11229217  | rs140390646  | intergenic | CLNK;MIR572   | G/A     | 0.040 | -3.521 (0.676) | 8.55E-07 |
| 4q32.3   | 164665271 | rs6847496    | intronic   | MARCHF1       | G/T     | 0.026 | -4.121 (0.791) | 8.61E-07 |
| 4q32.3   | 164664668 | rs17577453   | intronic   | MARCHF1       | T/C     | 0.026 | -4.120 (0.791) | 8.66E-07 |

Chr, chromosome; SNP, single nucleotide polymorphisms; MAF, minor allele frequency; SE, standard error; K-CHIP, the Korea Biobank Array

Table S2. Genome-wide association study-derived genetic variants in the K-CHIP consortium (Continued)



| Chr      | BP        | SNP         | Function   | Gene         | Alleles | MAF   | Beta (SE)       | P-value  |
|----------|-----------|-------------|------------|--------------|---------|-------|-----------------|----------|
| 4q32.3   | 164664101 | rs5012631   | intronic   | MARCHF1      | C/G     | 0.027 | -4.113 (0.790)  | 8.69E-07 |
| 4q32.3   | 164663804 | rs146477132 | intronic   | MARCHF1      | A/AT    | 0.026 | -4.120 (0.791)  | 8.72E-07 |
| 14q22.2  | 54445014  | rs189166361 | intergenic | BMP4;CDKN3   | G/A     | 0.033 | -3.827 (0.735)  | 8.80E-07 |
| 4q32.3   | 164663966 | rs954805    | intronic   | MARCHF1      | C/T     | 0.026 | -4.122 (0.792)  | 8.80E-07 |
| 5q11.2   | 56577733  | rs140712449 | intergenic | GPBP1;ACTBL2 | G/C     | 0.020 | -5.826 (1.120)  | 8.81E-07 |
| 4q32.3   | 164702553 | rs28562031  | intronic   | MARCHF1      | C/G     | 0.035 | -3.591 (0.690)  | 8.88E-07 |
| 4q32.3   | 164660169 | rs903300    | intronic   | MARCHF1      | C/T     | 0.026 | -4.115 (0.791)  | 8.99E-07 |
| 4q32.3   | 164659196 | rs9683694   | intronic   | MARCHF1      | G/T     | 0.026 | -4.115 (0.791)  | 9.00E-07 |
| 4q32.3   | 164659625 | rs2131863   | intronic   | MARCHF1      | A/G     | 0.026 | -4.114 (0.791)  | 9.02E-07 |
| 4q35.1   | 186557519 | rs190229637 | intronic   | SORBS2       | G/A     | 0.017 | -4.980 (0.958)  | 9.02E-07 |
| 4q32.3   | 164656734 | rs13142980  | intronic   | MARCHF1      | G/A     | 0.026 | -4.114 (0.791)  | 9.05E-07 |
| 4q32.3   | 164648499 | rs2101769   | intronic   | MARCHF1      | G/A     | 0.026 | -4.114 (0.792)  | 9.06E-07 |
| 4q32.3   | 164646243 | rs3921738   | intronic   | MARCHF1      | G/A     | 0.026 | -4.114 (0.792)  | 9.08E-07 |
| 13q13.1  | 32777632  | rs150859875 | intronic   | FRY          | G/A     | 0.018 | -4.233 (0.815)  | 9.17E-07 |
| 12p13.31 | 6335550   | rs141164457 | intronic   | CD9          | G/A     | 0.006 | -10.581 (2.037) | 9.18E-07 |
| 4q32.3   | 164691710 | rs2022557   | intronic   | MARCHF1      | A/T     | 0.034 | -3.693 (0.711)  | 9.25E-07 |
| 9q31.3   | 114650365 | rs148002888 | intergenic | SHOC1;UGCG   | T/C     | 0.019 | -5.027 (0.969)  | 9.38E-07 |
| 4q24     | 102711373 | rs73834300  | upstream   | BANK1        | G/C     | 0.048 | -3.111 (0.600)  | 9.71E-07 |
| 12p12.1  | 21386509  | rs34138322  | intronic   | SLCO1B1      | A/C     | 0.141 | -2.087 (0.403)  | 9.86E-07 |
| 1q21.3   | 151000257 | rs72292296  | intronic   | PRUNE1       | T/C     | 0.019 | -5.813 (1.123)  | 9.87E-07 |
| 3p26.2   | 3168971   | rs193122721 | UTR5       | TRNT1        | G/C     | 0.014 | -5.744 (1.110)  | 9.91E-07 |

Chr, chromosome; SNP, single nucleotide polymorphisms; MAF, minor allele frequency; SE, standard error; K-CHIP, the Korea Biobank Array

Table S3. Fine-mapping of the lead SNPs from the results of GWAS

| SNP                        | Position  | Function | Alleles   | MAF   | Beta (SE)      | P-value  | PIP  |
|----------------------------|-----------|----------|-----------|-------|----------------|----------|------|
| rs10009742 on MARCHF1 gene |           |          |           |       |                |          |      |
| rs6847496                  | 164665271 | intronic | G/T       | 0.026 | -4.121 (0.791) | 8.61E-07 | 0.16 |
| rs62333006                 | 164666401 | intronic | T/C       | 0.026 | -4.127 (0.792) | 8.53E-07 | 0.16 |
| rs17577474                 | 164666859 | intronic | G/A       | 0.026 | -4.128 (0.792) | 8.49E-07 | 0.16 |
| rs12502759                 | 164667565 | intronic | G/A       | 0.026 | -4.129 (0.792) | 8.38E-07 | 0.16 |
| rs17474074                 | 164668003 | intronic | G/T       | 0.026 | -4.130 (0.792) | 8.32E-07 | 0.16 |
| rs13139036                 | 164668086 | intronic | G/A       | 0.026 | -4.131 (0.792) | 8.27E-07 | 0.16 |
| rs12512360                 | 164669067 | intronic | A/C       | 0.026 | -4.132 (0.793) | 8.45E-07 | 0.16 |
| rs34491561                 | 164669328 | intronic | C/A       | 0.026 | -4.135 (0.792) | 8.27E-07 | 0.16 |
| rs12504820                 | 164669428 | intronic | C/T       | 0.026 | -4.135 (0.792) | 8.26E-07 | 0.16 |
| rs13101998                 | 164670165 | intronic | G/T       | 0.026 | -4.134 (0.791) | 7.99E-07 | 0.16 |
| rs13105978                 | 164672601 | intronic | T/A       | 0.026 | -4.138 (0.790) | 7.68E-07 | 0.16 |
| rs34162806                 | 164672948 | intronic | A/C       | 0.026 | -4.138 (0.790) | 7.68E-07 | 0.16 |
| rs139079372                | 164672979 | intronic | T/TGTGTGA | 0.026 | -4.138 (0.791) | 7.71E-07 | 0.16 |
| rs13136324                 | 164680214 | intronic | C/T       | 0.026 | -4.143 (0.791) | 7.56E-07 | 0.17 |
| rs71600637                 | 164670375 | intronic | C/CAT     | 0.027 | -4.127 (0.790) | 8.08E-07 | 0.18 |
| rs10009742                 | 164674901 | intronic | C/T       | 0.027 | -4.128 (0.790) | 8.01E-07 | 0.18 |
| rs6852270                  | 164665383 | intronic | C/T       | 0.027 | -4.116 (0.790) | 8.55E-07 | 0.18 |
| rs1390835129               | 164670444 | intronic | CT/C      | 0.027 | -4.129 (0.790) | 8.01E-07 | 0.18 |
| rs13127646                 | 164684385 | intronic | G/A       | 0.027 | -4.205 (0.786) | 4.65E-07 | 0.20 |

GWAS, genome-wide association study; SNP, single nucleotide polymorphism; MAF, minor allele frequency; SE, standard error; PIP, posterior inclusion probability
